CORRECTION

## Correction: Mathematical modeling suggests heterogeneous replication of *Mycobacterium tuberculosis* in rabbits

Vitaly V. Ganusov, Afsal Kolloli, SelvakumarSubbian

In the Funding statement, the grant number of the author Selvakumar Subbian (SS) is listed incorrectly. The correct grant number is: R01AI161822.

### Reference

1. Ganusov VV, Kolloli A, Subbian S. Mathematical modeling suggests heterogeneous replication of *Mycobacterium tuberculosis* in rabbits. PLoS Comput Biol. 2024;20(11):e1012563. <https://doi.org/10.1371/journal.pcbi.1012563> PMID: [39585901](https://pubmed.ncbi.nlm.nih.gov/39585901/)

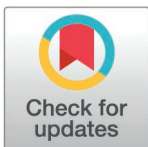

### OPEN ACCESS

**Citation:** Ganusov VV, Kolloli A, Subbian S (2025) Correction: Mathematical modeling suggests heterogeneous replication of *Mycobacterium tuberculosis* in rabbits. PLoS Comput Biol 21(4): e1013048. <https://doi.org/10.1371/journal.pcbi.1013048>

**Published:** April 25, 2025

**Copyright:** © 2025 Ganusov et al. This is an open access article distributed under the terms of the [Creative Commons Attribution License](https://creativecommons.org/licenses/by/4.0/), which permits unrestricted use, distribution, and reproduction in any medium, provided the original author and source are credited.
